# Supplementary material for: Unravelling Landslide Failure Mechanisms with Seismic Signal Analysis for Enhanced Pre-Survey Understanding
Source: Copernicus journal article supplement (doi:10.5194/egusphere-2024-1267), 2024-06-12
Supplement: Supplementary file 1 [file egusphere-2024-1267-supplement.pdf]

Supporting Information for

**Unravelling Landslide Failure Mechanisms with Seismic Signal Analysis for Enhanced Pre-Survey Understanding**

Jui-Ming Chang<sup>1,2</sup>, Che-Ming Yang<sup>3</sup>, Wei-An Chao<sup>1,2</sup>, Chin-Shang Ku<sup>4</sup>, Ming-Wan Huang<sup>3,5</sup>, Tung-Chou Hsieh<sup>2</sup>, Chi-Yao Hung<sup>6</sup>

<sup>1</sup>Department of Civil Engineering, National Yang Ming Chiao Tung University, Hsinchu 30010, Taiwan

<sup>2</sup>Disaster Prevention and Water Environment Research Center, National Yang Ming Chiao Tung University, Hsinchu 30010, Taiwan

<sup>3</sup>Department of Civil and Disaster Prevention Engineering, National United University, Miaoli 36063, Taiwan

<sup>4</sup>Institute of Earth Sciences, Academia Sinica, Taipei 11529, Taiwan

<sup>5</sup>He Yu Engineering Consultants Co. Ltd., Taichung 40642, Taiwan

<sup>6</sup>Department of Soil and Water Conservation, National Chung Hsing University, Taichung 40227, Taiwan

*Correspondence to:* Che-Ming Yang ([stanleyyangcm@nuu.edu.tw](mailto:stanleyyangcm@nuu.edu.tw))

**Contents of this file**

Tables S1-S3

Figures S1 to S7

**Table S1** Source of field photos for landslides

| <b>Photos</b>            | <b>Sources</b>                                                                                                                                          | <b>Announced time</b>      |
|--------------------------|---------------------------------------------------------------------------------------------------------------------------------------------------------|----------------------------|
| Figure 1(c),<br>(d), (e) | <a href="https://thbu4.thb.gov.tw/News_Content_table.aspx?n=5066&amp;s=198478">https://thbu4.thb.gov.tw/News_Content_table.aspx?n=5066&amp;s=198478</a> | 15:27 on 18 October, 2022  |
| Figure 1(f)              | <a href="https://thbu4.thb.gov.tw/News_Content_table.aspx?n=5066&amp;s=198469">https://thbu4.thb.gov.tw/News_Content_table.aspx?n=5066&amp;s=198469</a> | 17:41 on 17 October, 2022. |
| Figure 1(g)              | <a href="https://thbu4.thb.gov.tw/News_Content_table.aspx?n=5066&amp;s=198468">https://thbu4.thb.gov.tw/News_Content_table.aspx?n=5066&amp;s=198468</a> | 14:46 on 17 October, 2022. |
| Figure 1(h),<br>(i), (j) | <a href="https://thbu4.thb.gov.tw/News_Content_table.aspx?n=5066&amp;s=198460">https://thbu4.thb.gov.tw/News_Content_table.aspx?n=5066&amp;s=198460</a> | 15:52 on 16 October, 2022. |

Last accessed: 4 April 2024

**Table S2** Weighting coefficient for grid-based single force by different signal-to-noise ratio (Chao et al., 2017)

| <b>Signal-to-noise ratio (SNR)</b> | <b>Weighting Coefficient</b> |
|------------------------------------|------------------------------|
| SNR $\geq$ 5.0                     | 1                            |
| 4.5 $\leq$ SNR <5.0                | 0.8                          |
| 4.0 $\leq$ SNR <4.5                | 0.6                          |
| 3.0 $\leq$ SNR <4.0                | 0.4                          |
| SNR<3.0                            | 0.1                          |

**Table S3** Seismometers for this research

| <b>Stations</b>                    | <b>Sensor</b>                                  | <b>Maintained institute</b>              |
|------------------------------------|------------------------------------------------|------------------------------------------|
| LATB, NNSB,<br>YHNB, NACB,<br>HGSD | Trillium 120PH, Trillium 240,<br>STS-2, CMG3TB | Academia Sinica                          |
| ENT                                | Short-period Seismometer<br>Model S-13         | Central Weather Administration, Taiwan   |
| V03G                               | 4.5 Hz 3-component-geophone                    | National Yang-Ming Chiao Tung University |

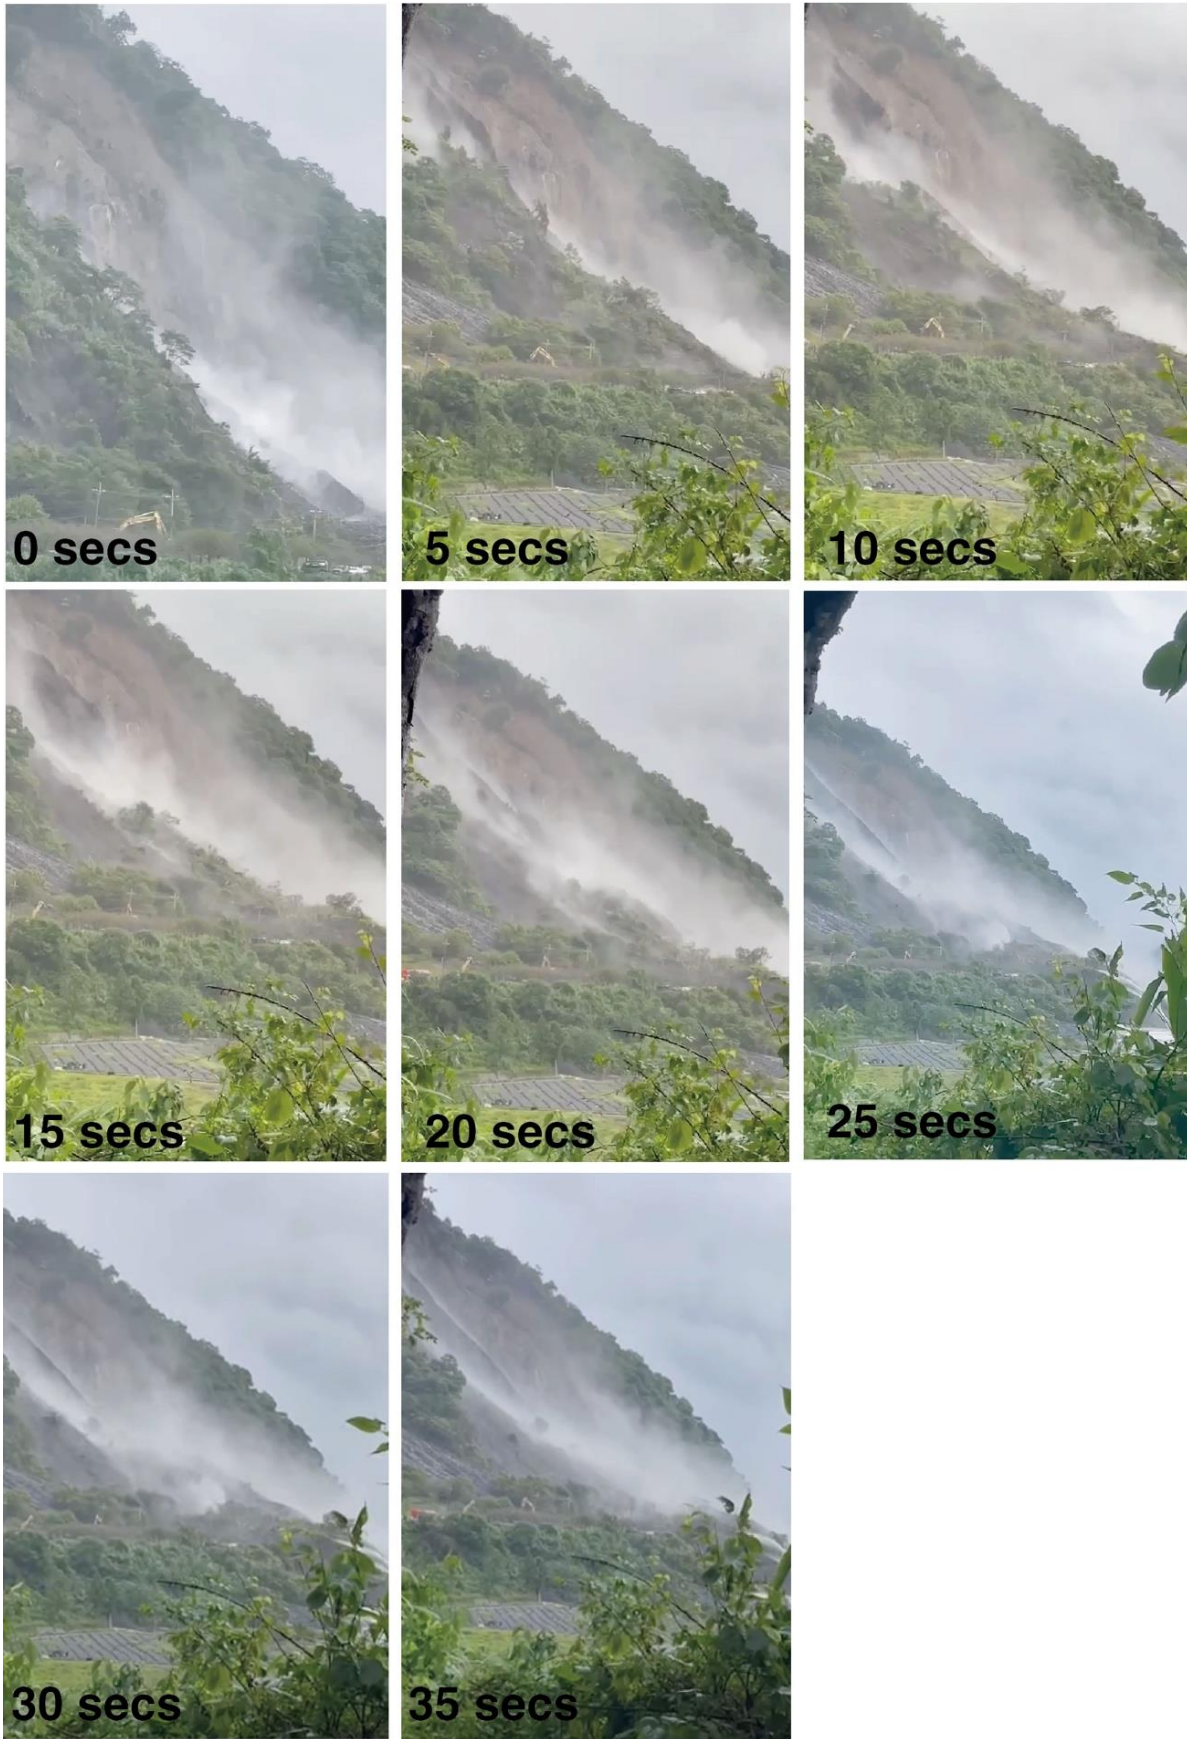

**Figure S1** Video caption at different moments of the CL. ([https://www.youtube.com/watch?v=cNz\\_Jlid5aI](https://www.youtube.com/watch?v=cNz_Jlid5aI); last accessed: 2 April 2024)

媒體報導台7甲線大面積崩塌，經查證為台7線86.5K~86.9K上方坡地崩塌，該路段已實施緊急性封路

公告期限：112-11-16 18:39

|      |                                                                                                                                                                                                                                                                                                                                                                                                                                                                                                                    |
|------|--------------------------------------------------------------------------------------------------------------------------------------------------------------------------------------------------------------------------------------------------------------------------------------------------------------------------------------------------------------------------------------------------------------------------------------------------------------------------------------------------------------------|
| 分類   | 重大新聞                                                                                                                                                                                                                                                                                                                                                                                                                                                                                                               |
| 公告日期 | 111-10-16 18:39                                                                                                                                                                                                                                                                                                                                                                                                                                                                                                    |
| 公告單位 | 第四區養護工程處-交通管理及控制中心                                                                                                                                                                                                                                                                                                                                                                                                                                                                                                 |
| 內容   | <p>受尼莎颱風外圍環流影響，宜蘭縣大同鄉英士路段二日已降下逾9百毫米超大豪雨，造成台7線86.5K~86.9K上方坡地集水區大量逕流水致土石崩坍災情，公路總局於(16)日上午動員大型機具進場搶修，原預計今(16)日17時搶通，惟坡地受持續性逕流水沖蝕，位址坡地於下午4時再度滑落大量土石泥流，並新增臨近台7線87.3k、86.7k二處坍方災點，影響增援機具挺進，道路雙向阻斷，3處災點搶災機具仍持續清坍搶修中，惟重現性土石泥流不斷淹沒道路，預估將延至明日中午12時搶通。公路總局呼籲用路人，東北部入秋後好發東北季風降雨，為防範行車風險，行駛山區道路請事先作好行程規劃，有豪雨警訊避免進入山區公路，並請多利用公路總局省道即時路況系統 (<a href="http://168.thb.gov.tw">http://168.thb.gov.tw</a>) 並隨時注意收聽廣播訊息。</p> <p>承辦單位: 獨立山工務段<br/>                 路況查詢電話: 03-9962683<br/>                 聯絡人: 段長林士智 (03-9809601)</p> |

**Figure S2** Announcement shown in Chinese of the exact landslide location from the Directorate General of Highways, Taiwan ([https://thbu4.thb.gov.tw/News\\_Content\\_table.aspx?n=5066&s=198462](https://thbu4.thb.gov.tw/News_Content_table.aspx?n=5066&s=198462); (Last accessed: 4 April 2024)

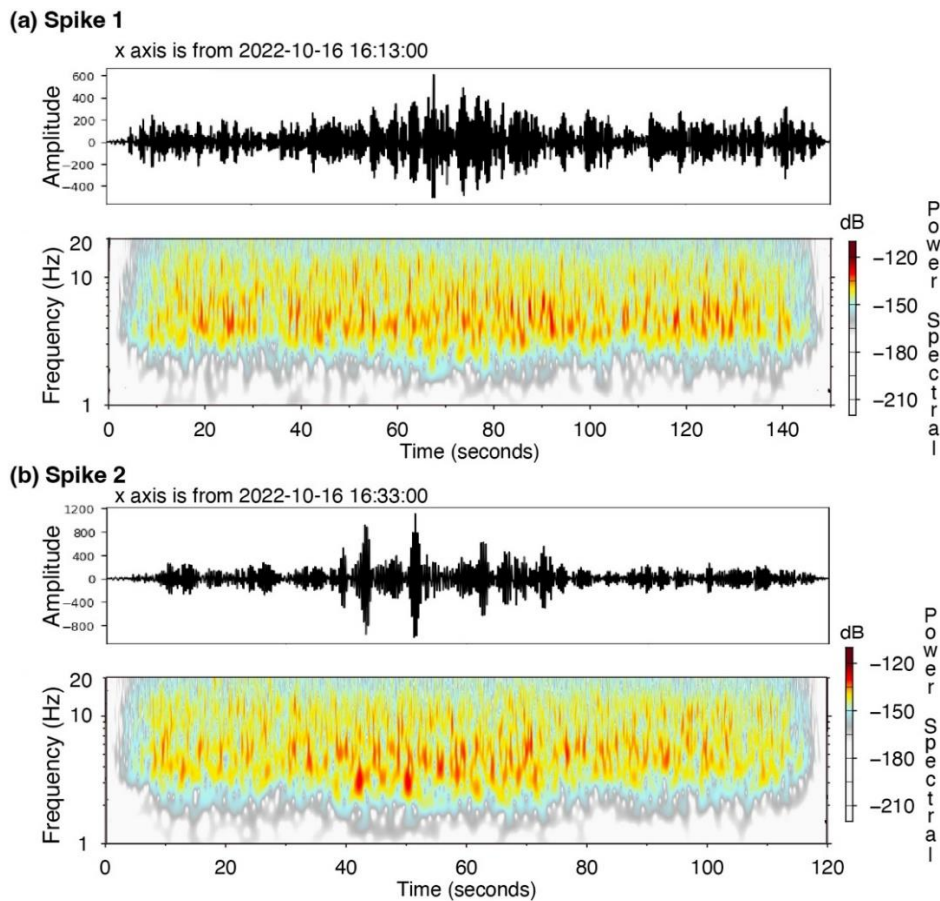

**Figure S3** Spectrograms and waveforms of (a) spike 1 and (b) spike 2.



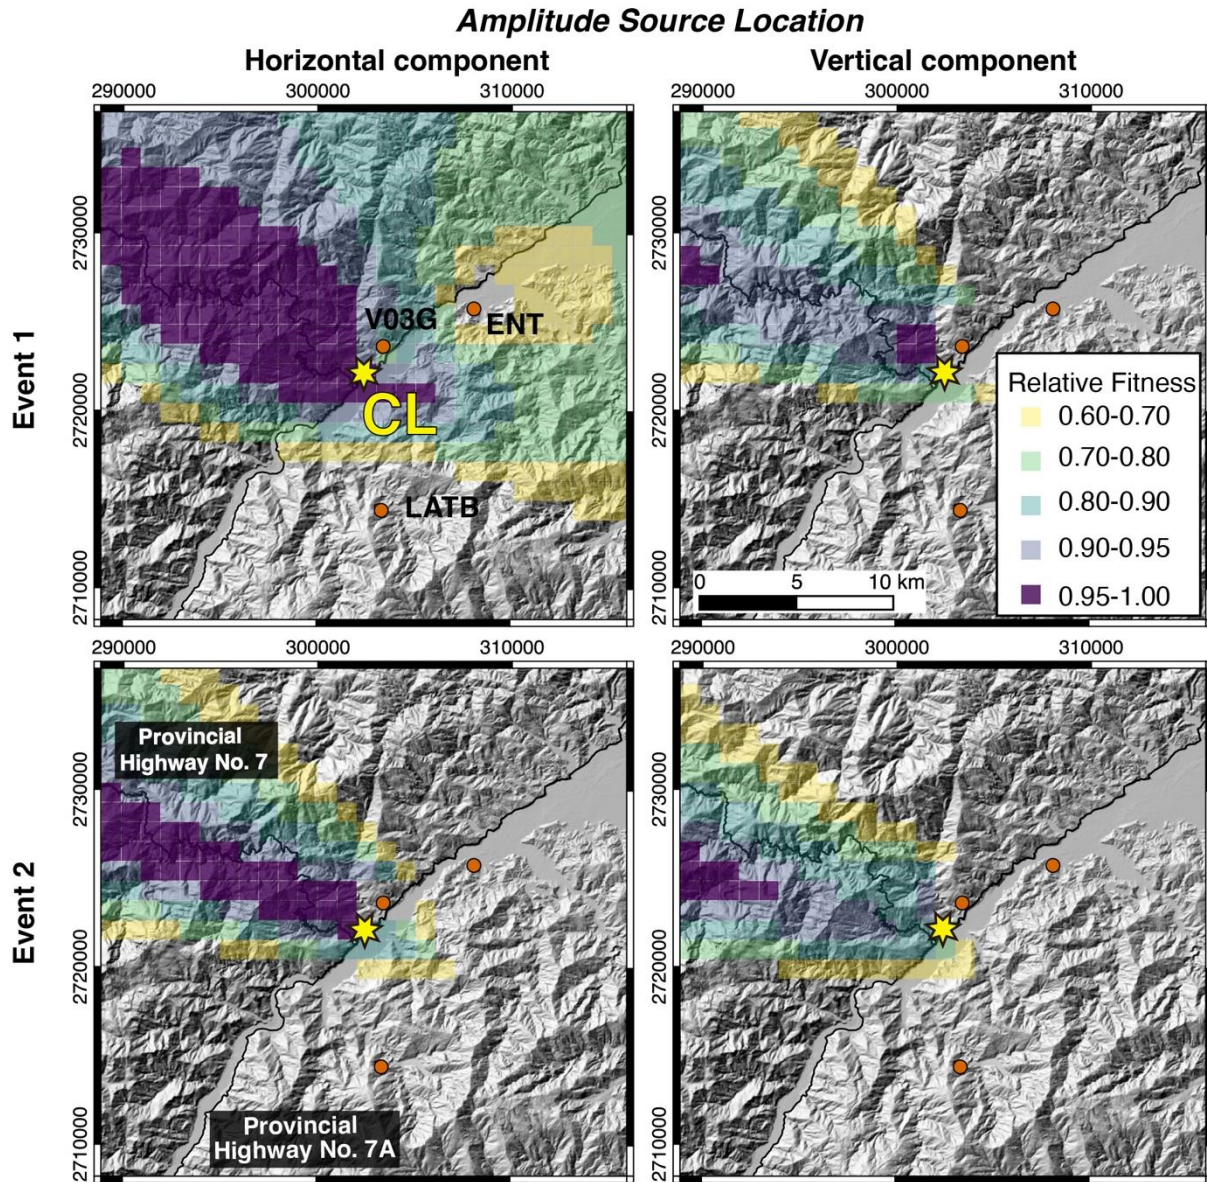

**Figure S4** Location determination by amplitude source location of horizontal and vertical components data for Event 1 and Event 2.

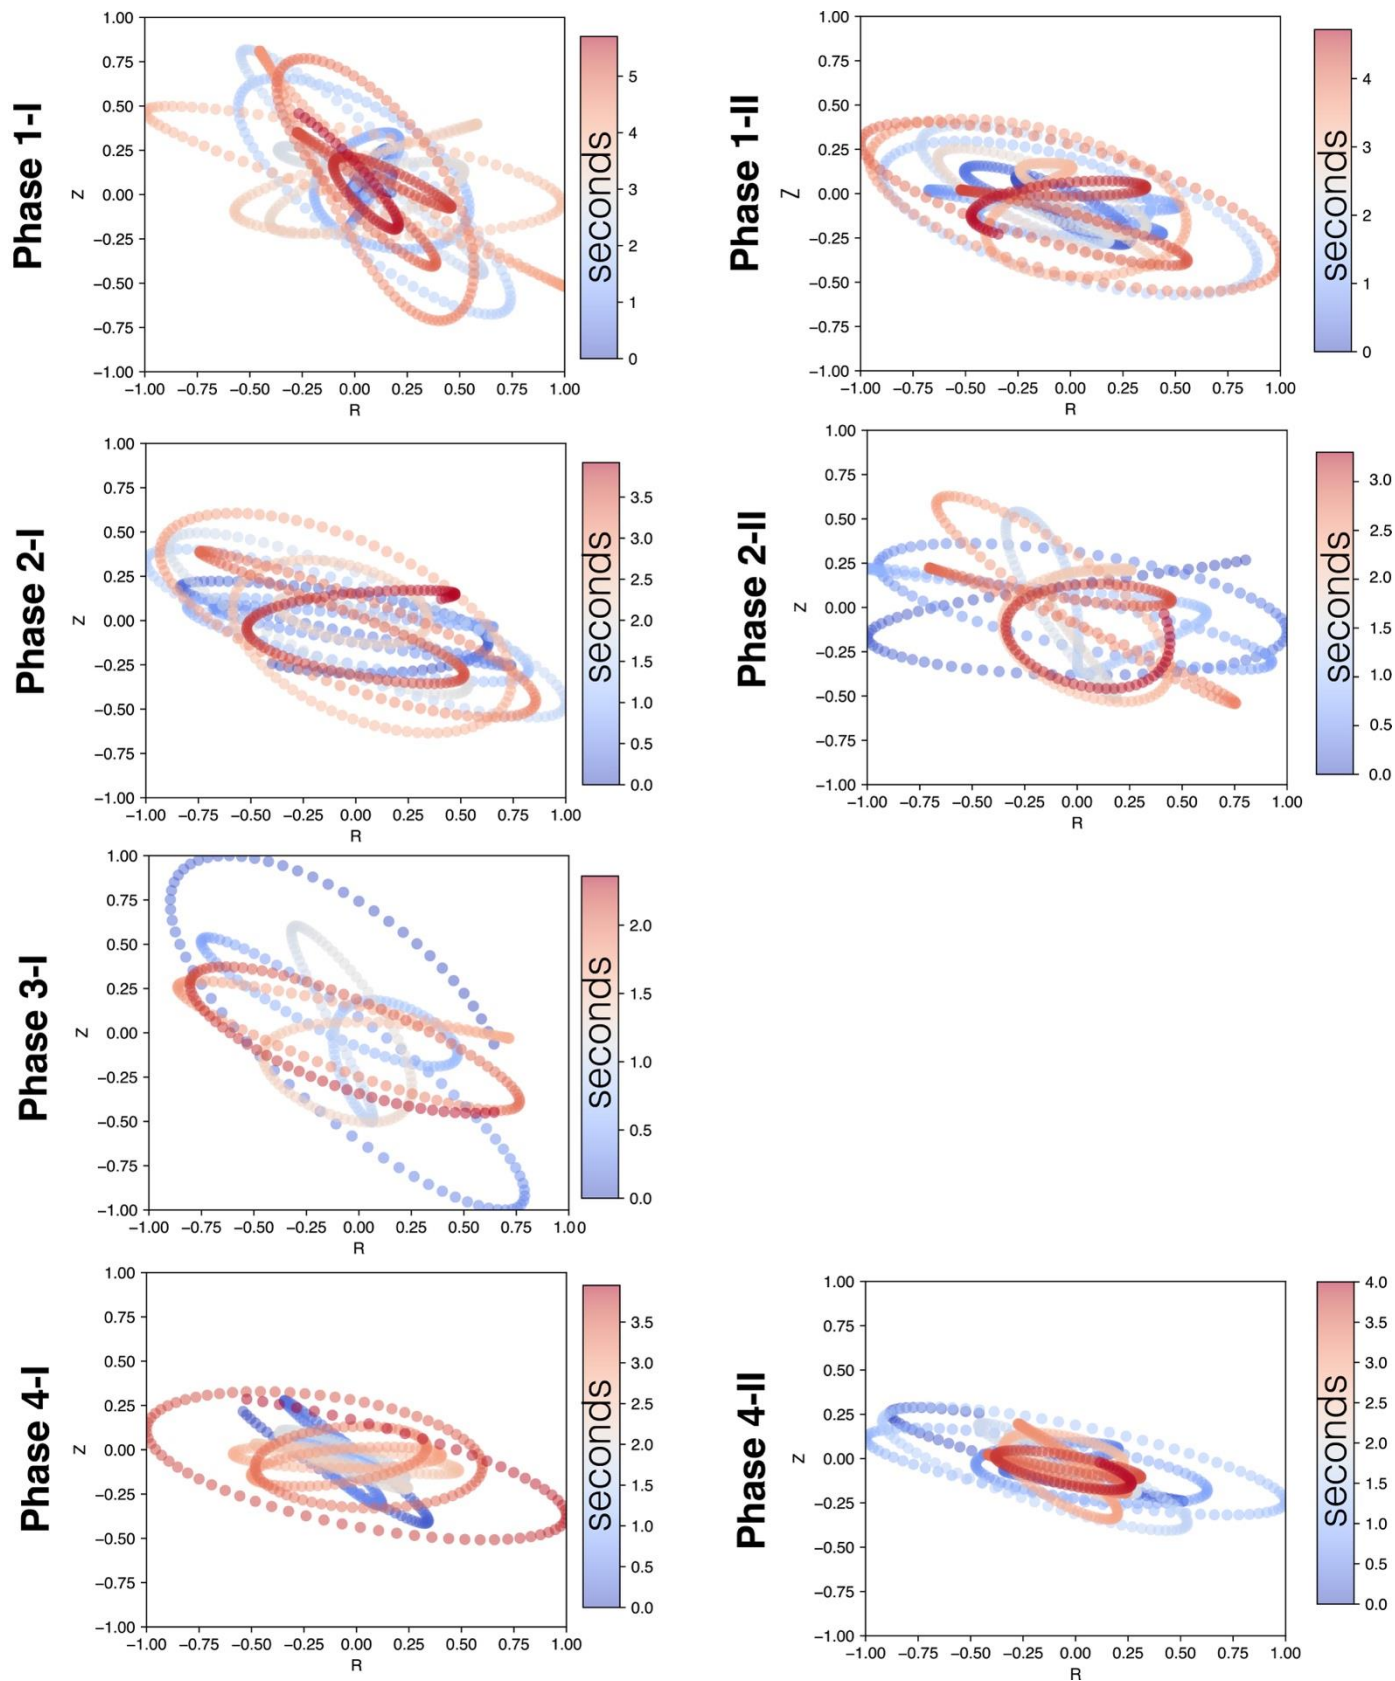

**Figure S5** Particle motion of Event 1 for different sliding phases with vertical ( $Z$ ) and radial( $R$ ) components.

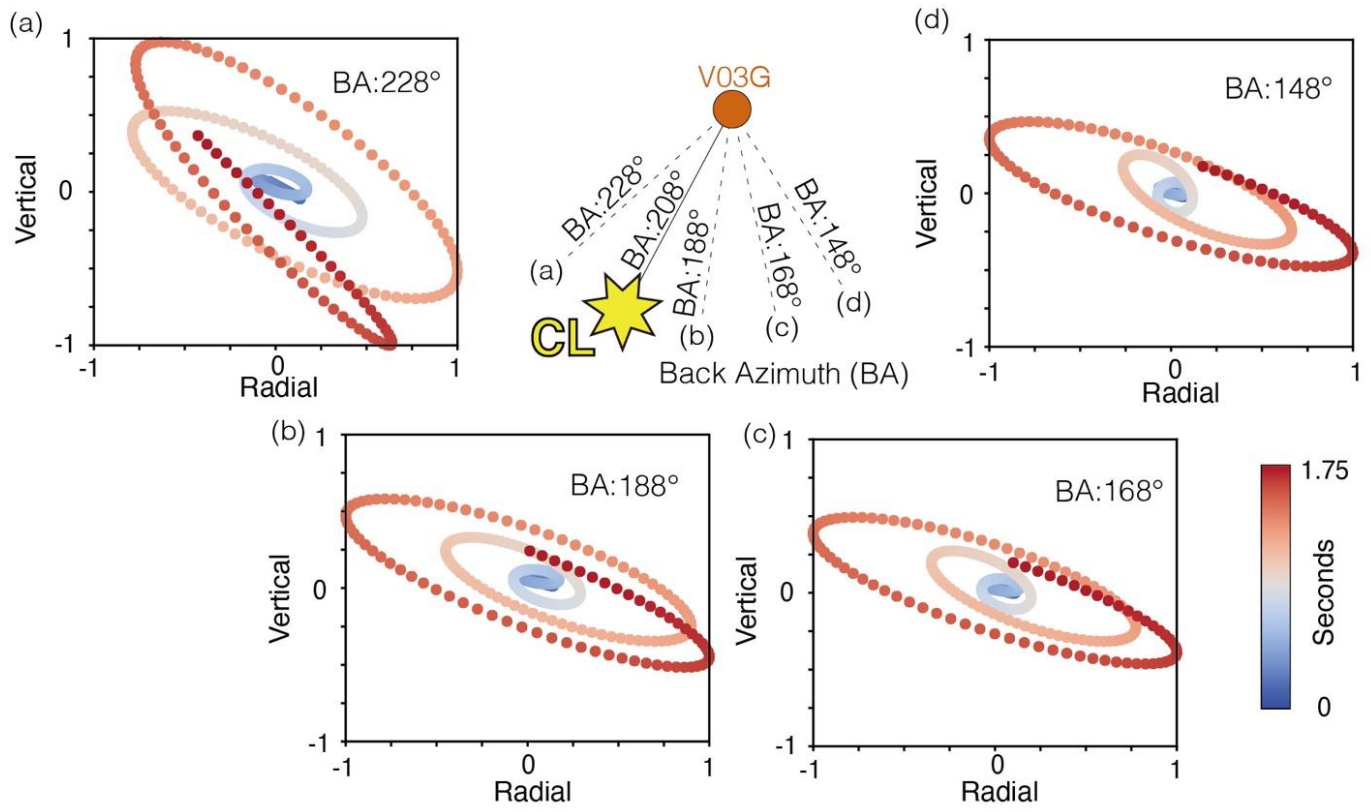

**Figure S6** Particle motion of Event 2 rotating different back azimuths to radial components. (a) 228°, (b) 188°, (c) 168°, and (d) 148°.



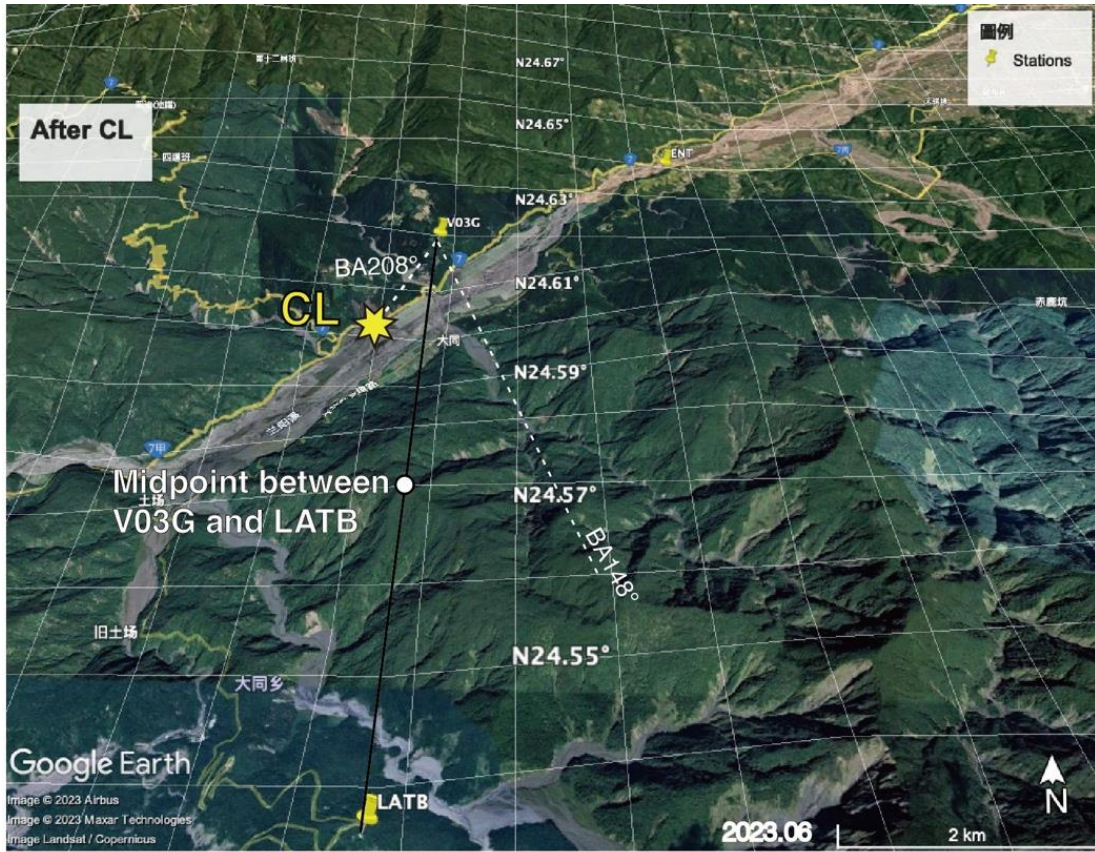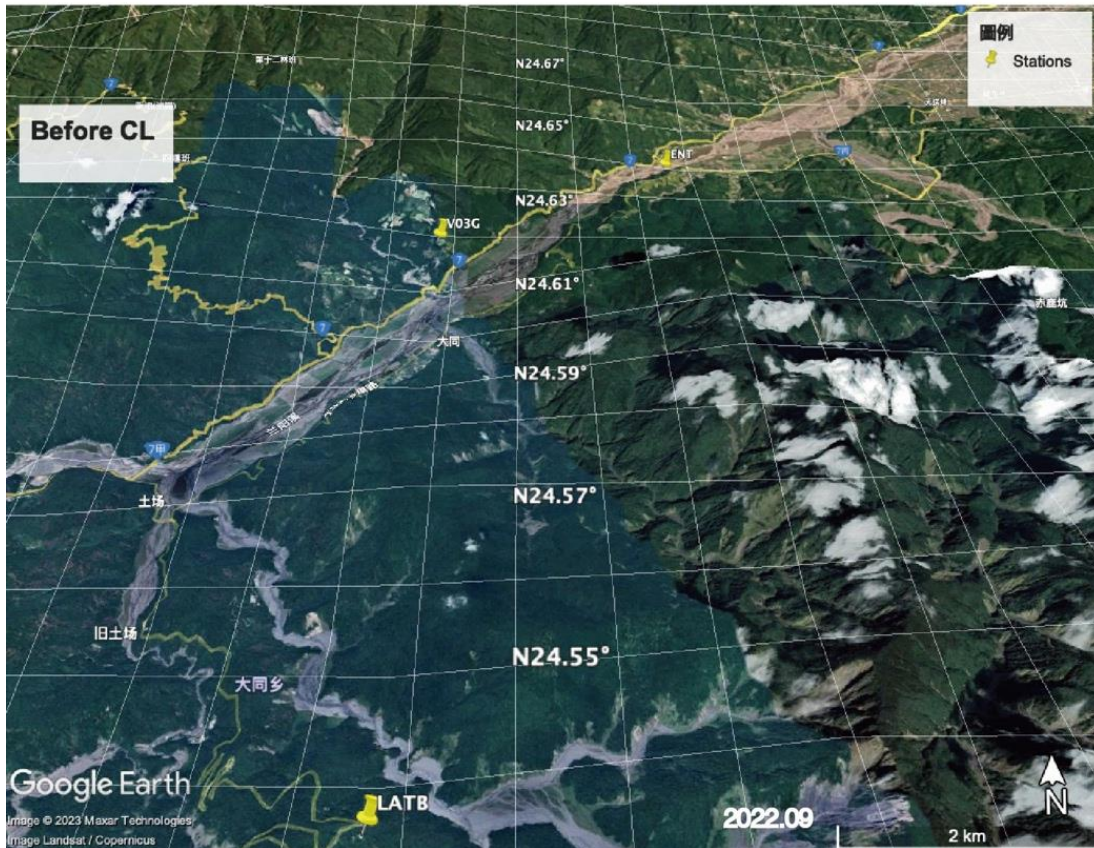

Figure S7 Satellite images before and after the CL.
